# Supplementary material for: Molecular determinants of complexin clamping and activation function
Source: eLife. 2022 Apr 20;11:e71938. doi: 10.7554/eLife.71938 (PMC9020821; doi:10.7554/eLife.71938)
Supplement: Figure 1—figure supplement 2—source data 1. [file elife-71938-fig1-figsupp2-data1.xlsx]

## Sheet: Sheet1
	Figure 1 Supplement 2
		Bilayer		Vesicle
		Average	SD	Average	SD
	mCPXWT	90.33	1.53	89.25	2.5
	mCPX26-83	55.3	4.2	52.3	3.8
	mCPXL117W	89.33	2.08	88.44	1.2
		Number of independent experiments = 3
		Number of vesicle measured: ~100
