# Supplementary material for: Molecular determinants of complexin clamping and activation function
Source: eLife. 2022 Apr 20;11:e71938. doi: 10.7554/eLife.71938 (PMC9020821; doi:10.7554/eLife.71938)
Supplement: Figure 1—figure supplement 3—source data 1. [file elife-71938-fig1-figsupp3-data1.xlsx]

## Sheet: Sheet1
	Figure 1 Supplement 3
	Time (min)	no DNA	5 ssDNA	10 ssDNA	20 ssDNA	40 ssDNA	50 ssDNA	100 ssDNA
	0	0.261717	0.552208	0.0428513	0.192168	0.325099	0.196369	0
	1	0.492483	0.288502	0.114938	0.338095	0.575174	0.145401	0.203367
	2	0.210949	0	0.0589551	0.243164	0.282071	0	0.147649
	3	0.146382	0.0976641	0.20617	0.280863	0.342898	0.349339	0.358621
	4	0.751012	0.390181	0.473645	0.829976	0.768788	0.801759	0.954418
	5	0.448828	0.457206	0.552644	0.392126	0.392872	1.1075	1.22943
	6	0.86197	0.472071	0.968901	0.72855	0.459062	1.2491	1.2919
	7	1.25166	0.743384	1.42683	1.07286	0.777062	1.64764	1.50064
	8	1.42625	0.801788	1.73589	1.08439	0.818303	1.8771	1.87307
	9	1.48661	0.735365	1.93004	1.21057	0.882168	1.84786	1.75616
	10	1.79129	1.09957	2.44365	1.45846	0.941054	2.27116	2.10567
	11	2.36533	1.34914	2.94078	1.84647	1.39971	2.51249	2.34232
	12	2.58674	1.5307	3.34922	2.05234	1.54835	2.85431	2.55317
	13	2.81584	1.76442	3.83535	2.23777	1.68908	3.04176	2.51026
	14	3.27345	2.32884	4.28711	2.69996	1.94541	3.66664	3.14858
	15	3.45671	2.60451	4.51353	2.65677	1.90604	3.72683	3.33486
	16	3.82895	2.79638	5.1141	3.12545	2.37056	3.9028	3.2912
	17	3.94862	3.08786	5.27737	3.1989	2.28703	4.04555	3.47075
	18	4.32658	3.47836	5.70254	3.50294	2.7187	4.39835	3.75232
	19	4.86141	3.89383	6.54939	4.05589	3.11389	4.76934	4.02277
	20	5.0376	4.22723	6.94606	4.24469	3.44029	4.9132	4.11471
	21	4.99661	4.48534	6.68345	4.25072	3.25128	5.00876	4.31056
	22	5.52601	4.7194	7.28935	4.64755	3.55069	5.10682	4.27711
	23	5.86719	4.92213	7.69407	4.9442	3.72773	5.20218	4.21089
	24	6.34894	5.51414	7.76558	5.24728	4.25734	5.55226	4.5217
	25	6.39029	5.60286	8.07823	5.2726	4.51015	5.53756	4.52708
	26	6.29744	5.90096	8.07455	5.44001	4.40247	5.87781	4.65919
	27	7.32313	6.58813	9.02721	6.14061	5.13341	6.37616	5.32811
	28	7.22271	6.68891	9.01624	5.99611	5.05463	6.08941	4.83782
	29	8.04712	7.00313	9.78385	6.67892	5.71755	6.44366	5.48114
	30	7.85822	7.2932	9.6888	6.6968	5.69002	6.58832	5.26283
	31	8.29102	8.0588	10.3965	7.05796	6.04362	7.08065	5.84991
	32	8.54957	8.16374	10.1906	7.17091	6.22451	7.05011	5.81167
	33	8.98172	8.52083	10.9319	7.85358	6.74542	7.25064	5.86007
	34	9.49664	8.93527	11.404	8.12135	6.97816	7.62762	6.19943
	35	10.0212	9.51095	11.8574	8.73045	7.75287	7.96763	6.63062
	36	9.97627	10.3143	11.9266	8.63867	7.38385	8.49833	6.965
	37	10.3302	10.1945	12.2448	8.93225	7.56799	8.44647	6.99585
	38	10.6164	10.5819	12.3902	9.36176	8.16722	8.49161	7.02615
	39	11.5912	10.9989	13.2185	9.92083	8.74934	8.69556	7.41206
	40	11.7341	11.4244	13.39	10.2106	9.09014	9.01636	7.43971
	41	11.8309	11.7078	13.4715	10.3454	9.08882	9.18013	7.68659
	42	12.3424	11.8626	14.2096	10.8291	9.88048	9.15252	7.528
	43	12.6315	12.492	14.3302	11.0972	9.99261	9.53704	8.02464
	44	13.1434	12.5324	14.9652	11.4276	10.2406	9.39682	7.89145
	45	13.3343	12.8171	15.2538	11.6997	10.5618	9.72719	8.21901
	46	13.8489	13.0554	15.6594	12.2165	11.037	9.73641	8.06703
	47	13.2863	13.6936	15.4126	11.6672	10.9672	10.1984	8.47252
	48	14.1098	13.8767	15.9158	12.3625	11.2287	10.25	8.50385
	49	14.1808	14.4035	16.186	12.4527	11.4039	10.5892	8.89087
	50	15.0206	14.6412	16.6115	13.1844	12.1488	10.5322	8.64174
	51	15.1238	14.9256	16.9823	13.4412	12.2433	10.9236	9.14099
	52	15.4175	15.5003	17.1617	13.8017	12.5307	11.2742	9.46076
	53	15.8206	15.7956	17.6322	14.2899	13.032	11.2814	9.64341
	54	15.8048	15.5578	17.4094	13.9632	12.908	11.0331	9.21393
	55	16.2706	16.2188	17.7776	14.3641	13.2891	11.5045	9.79078
	56	16.4525	16.2993	17.9183	14.7713	13.5656	11.39	9.58198
	57	16.9951	17.2051	18.8112	15.1738	13.9697	12.0388	10.1672
	58	16.0594	17.1573	17.7251	14.1656	13.0108	12.2131	10.2524
	59	17.1659	17.2182	18.7012	15.2423	14.0574	11.9246	10.0991
	60	17.3536	17.5099	19.0904	15.627	14.4394	12.0294	10.1353
	61	17.5841	17.7381	19.2321	15.7621	14.5826	12.2273	10.3505
	62	17.8036	18.463	19.5199	15.681	14.6538	12.6833	10.8569
	63	18.1553	18.584	19.6947	15.9654	15.1046	12.6526	10.694
	64	18.182	18.5863	19.9686	16.4246	15.0329	12.7529	10.7536
	65	18.6111	19.2653	20.3719	16.7592	15.4813	13.2195	11.2284
	66	18.6697	19.4104	20.5109	16.7663	15.6722	13.1783	11.2737
	67	18.4478	19.0867	20.349	16.6072	15.3383	12.9148	10.9272
	68	19.5673	20.4369	20.9032	17.3997	16.1925	13.8707	11.6482
	69	19.3627	19.7474	20.944	17.307	16.076	13.3095	11.2081
	70	19.5473	20.3164	21.2243	17.6159	16.4348	13.5886	11.4829
	71	18.9173	20.7845	20.9249	17.0764	15.9011	13.9999	11.902
	72	20.938	20.8537	22.5788	18.6784	17.4612	14.002	11.8267
	73	20.4287	21.2114	22.0336	18.1683	17.2236	14.2899	12.2438
	74	20.7667	21.4412	22.3988	18.6781	17.2406	14.3688	12.3484
	75	20.8414	21.2869	22.1914	18.704	17.5133	14.1819	12.2331
	76	21.0842	21.688	22.7254	19.066	17.8617	14.4577	12.367
	77	21.1188	22.3017	22.4873	19.1432	17.743	14.8586	12.6327
	78	21.2413	22.9061	22.6912	19.3164	17.9821	15.096	12.9086
	79	21.8561	22.5907	23.4014	19.7609	18.4707	15.0209	12.8962
	80	21.5297	22.6751	23.5158	19.2073	18.1195	14.9372	12.5678
	81	21.6267	23.0804	23.4216	19.5004	18.3603	15.4101	13.2088
	82	21.7427	23.3672	23.0477	19.3465	18.3928	15.4086	13.2744
	83	22.1823	23.4174	23.8697	20.0027	18.7548	15.4999	13.3291
	84	22.5525	23.5825	24.1089	20.2635	19.0894	15.5355	13.0996
	85	22.516	23.6176	24.3811	20.5783	19.1118	15.5026	13.2928
	86	22.8929	24.1262	24.1972	20.7639	19.4791	15.8905	13.4938
	87	22.9156	24.6661	24.8219	20.6783	19.3947	16.2476	13.8236
	88	23.1336	24.1964	24.2119	20.8502	19.6618	16.053	13.5715
