# Supplementary material for: Molecular determinants of complexin clamping and activation function
Source: eLife. 2022 Apr 20;11:e71938. doi: 10.7554/eLife.71938 (PMC9020821; doi:10.7554/eLife.71938)
Supplement: Figure 1—figure supplement 4—source data 1. [file elife-71938-fig1-figsupp4-data1.xlsx]

## Sheet: Sheet1
	Figure 1 Supplement 4
						(D) VAMP12 (Survival Percentage)
	(A) VAMP70 + ssDNA20 (Survival Percentage)				Time (sec)	No ssDNA		20 ssDNA		20 ssDNA + mCPX
	mCPXWTConcentration (mM)	Average	SD			Average	SD	Average	SD	Average	SD
	0	4	1		0.147	100	0	100	0	100	0
	0.5	37	4		0.294	100	0	98.791	1.057	100	0
	2	82	3		0.441	91.3751	5.85626	96.769	0.747	100	0
	20	85	2		0.588	79.2534	8.6932	95.956	0.78	100	0
					0.735	70.8259	8.42167	95.956	0.78	100	0
	(B) VAMP70 + ssDNA5 (Survival Percentage)				0.882	55.4972	6.24549	95.956	0.78	100	0
	mCPXWT Concentration (mM)	Average	SD		1.029	46.7944	3.7025	95.956	0.78	100	0
	0	2.4	1		1.176	39.2215	4.51456	94.747	0.548	100	0
	2	3.3	1		1.323	35.0991	7.70401	94.747	0.548	98.29	1.509
	50	8	2		1.47	30.2289	5.65384	92.724	0.589	97.457	0.295
					1.617	26.1989	6.70742	92.724	0.589	97.457	0.295
	(C) VAMP70 + ssDNA20 (Survival Percentage)				1.764	24.7793	6.45333	89.493	1.096	97.457	0.295
		Average	SD		1.911	22.4125	7.33306	89.493	1.096	95.747	1.627
	mCPXWT	85	2		2.058	16.9773	4.47793	87.867	2.339	94.037	3.125
	mCPX48-134	19	1.7		2.205	16.9773	4.47793	84.24	1.644	89.784	4.748
	mCPXGP	31	4		2.352	15.5577	4.15521	83.03	2.501	88.95	3.404
					2.499	14.9927	3.18111	79.382	1.988	87.284	1.473
	Number of independent experiments = 3				2.646	11.3131	1.90608	79.382	1.988	87.284	1.473
	Number of vesicle measured: ~100				2.793	10.4584	2.92134	77.36	2.326	85.574	2.42
					2.94	9.55754	1.64686	76.547	3.415	85.574	2.42
					3.087	8.99256	1.6225	76.547	3.415	85.574	2.42
					3.234	8.42759	2.11377	75.734	4.678	84.74	1.768
					3.381	8.42759	2.11377	75.734	4.678	84.74	1.768
					3.528	7.52669	0.67953	74.427	4.911	84.74	1.768
					3.675	6.62579	1.15119	73.316	3.041	84.74	1.768
					3.822	6.62579	1.15119	73.316	3.041	84.74	1.768
					3.969	6.62579	1.15119	73.316	3.041	84.74	1.768
					4.116	6.62579	1.15119	73.316	3.041	84.74	1.768
					4.263	6.62579	1.15119	71.69	5.457	84.74	1.768
					4.41	6.62579	1.15119	71.69	5.457	84.74	1.768
					4.557	6.06082	1.42198	71.036	5.42	84.74	1.768
					4.704	6.06082	1.42198	70.481	4.574	84.74	1.768
					4.851	6.06082	1.42198	70.481	4.574	84.74	1.768
					4.998	6.06082	1.42198	69.173	5.062	84.74	1.768
					5.145	6.06082	1.42198	68.062	3.148	84.74	1.768
					5.292	6.06082	1.42198	68.062	3.148	84.74	1.768
					5.439	6.06082	1.42198	67.249	4.157	84.74	1.768
					5.586	6.06082	1.42198	67.249	4.157	84.74	1.768
					5.733	6.06082	1.42198	67.249	4.157	84.74	1.768
					5.88	6.06082	1.42198	64.97	6.569	84.74	1.768
					6.027	6.06082	1.42198	64.97	6.569	84.74	1.768
					6.174	5.49585	2.15266	64.414	5.737	84.74	1.768
					6.321	5.49585	2.15266	63.761	5.799	84.74	1.768
					6.468	5.49585	2.15266	63.761	5.799	84.74	1.768
					6.615	5.49585	2.15266	63.205	4.915	84.74	1.768
					6.762	5.49585	2.15266	63.205	4.915	84.74	1.768
					6.909	5.49585	2.15266	63.205	4.915	84.74	1.768
					7.056	5.49585	2.15266	62.392	6.126	84.74	1.768
					7.203	5.49585	2.15266	62.392	6.126	84.74	1.768
					7.35	5.49585	2.15266	62.392	6.126	84.74	1.768
					7.497	5.49585	2.15266	61.579	7.407	84.74	1.768
					7.644	5.49585	2.15266	61.579	7.407	84.74	1.768
					7.791	5.49585	2.15266	60.925	7.338	84.74	1.768
					7.938	5.49585	2.15266	60.925	7.338	84.74	1.768
					8.085	5.49585	2.15266	60.37	6.514	84.74	1.768
					8.232	5.49585	2.15266	60.37	6.514	84.74	1.768
					8.379	4.59495	2.70431	60.37	6.514	84.74	1.768
					8.526	4.59495	2.70431	60.37	6.514	84.74	1.768
					8.673	4.59495	2.70431	60.37	6.514	84.74	1.768
					8.82	4.59495	2.70431	60.37	6.514	84.74	1.768
					8.967	4.59495	2.70431	60.37	6.514	84.74	1.768
					9.114	4.59495	2.70431	60.37	6.514	84.74	1.768
					9.261	4.59495	2.70431	59.557	7.796	84.74	1.768
					9.408	4.59495	2.70431	59.557	7.796	84.74	1.768
					9.555	4.59495	2.70431	58.903	7.724	84.74	1.768
					9.702	4.59495	2.70431	58.903	7.724	84.74	1.768
					9.849	4.59495	2.70431	58.903	7.724	84.74	1.768
					9.996	4.59495	2.70431	58.348	6.903	84.74	1.768
						Number of independent experiments = 3
						Number of vesicle measured: ~125
