# Supplementary material for: Molecular determinants of complexin clamping and activation function
Source: eLife. 2022 Apr 20;11:e71938. doi: 10.7554/eLife.71938 (PMC9020821; doi:10.7554/eLife.71938)
Supplement: Figure 1—source data 1. [file elife-71938-fig1-data1.xlsx]

## Sheet: Figure-1
Figure 1
	Survival Percentage
Time (s)	No ssDNA		5 ssDNA		20 ssDNA
	-CPX	$+CPX	$-CPX	$+CPX	$-CPX	$+CPX
0.147	1	1	1	1	1	1
0.294	0.98567	0.94998	1	1	1	1
0.441	0.91386	0.8539	1	0.95181	1	1
0.588	0.80524	0.67139	0.89	0.72289	1	1
0.735	0.66464	0.49452	0.82	0.57831	0.98	0.99254
0.882	0.54802	0.3941	0.74	0.43373	0.96	0.98507
1.029	0.42589	0.29809	0.61	0.25301	0.9	0.97015
1.176	0.34085	0.22768	0.53	0.19277	0.82	0.95522
1.323	0.27601	0.17632	0.41	0.13253	0.77	0.95522
1.47	0.19545	0.11166	0.35	0.08434	0.66	0.94776
1.617	0.15517	0.09501	0.28	0.06024	0.54	0.94776
1.764	0.12266	0.08117	0.22	0.06024	0.36364	0.9403
1.911	0.10624	0.0669	0.14	0.06024	0.27273	0.92537
2.058	0.0934	0.06171	0.09	0.06024	0.22	0.91791
2.205	0.07843	0.05444	0.06	0.06024	0.19	0.91045
2.352	0.07552	0.05444	0.05	0.06024	0.14	0.89552
2.499	0.07086	0.04421	0.04	0.04819	0.1	0.88806
2.646	0.06678	0.04421	0.03226	0.04819	0.09091	0.8806
2.793	0.06328	0.04198	0.03226	0.04819	0.08	0.8806
2.94	0.05759	0.03917	0.03226	0.04819	0.08	0.87313
3.087	0.05759	0.03917	0.03226	0.04819	0.08	0.87313
3.234	0.05583	0.0319	0.03226	0.04819	0.08	0.86567
3.381	0.05583	0.0319	0.03226	0.04819	0.08	0.85821
3.528	0.05583	0.02909	0.03226	0.04819	0.08	0.85821
3.675	0.05351	0.0267	0.03226	0.04819	0.08	0.85075
3.822	0.05351	0.0267	0.03226	0.04819	0.08	0.85075
3.969	0.04836	0.0267	0.03226	0.04819	0.08	0.85075
4.116	0.04836	0.0267	0.03226	0.04819	0.08	0.85075
4.263	0.04836	0.0267	0.03226	0.04819	0.08	0.85075
4.41	0.04836	0.0267	0.03226	0.04819	0.08	0.85075
4.557	0.04836	0.02432	0.03226	0.04819	0.08	0.85075
4.704	0.04836	0.02432	0.03226	0.04819	0.08	0.85075
4.851	0.04836	0.02432	0.03226	0.03614	0.08	0.85075
4.998	0.04836	0.02432	0.03226	0.03614	0.08	0.85075
5.145	0.04836	0.02432	0.03226	0.03614	0.08	0.85075
5.292	0.04836	0.02432	0.03226	0.03614	0.08	0.85075
5.439	0.04322	0.02432	0.03226	0.03614	0.08	0.84328
5.586	0.04322	0.02432	0.03226	0.03614	0.08	0.84328
5.733	0.04322	0.02432	0.03226	0.03614	0.08	0.84328
5.88	0.04322	0.02432	0.03226	0.03614	0.08	0.84328
6.027	0.04322	0.02432	0.03226	0.03614	0.08	0.84328
