# Supplementary material for: Molecular determinants of complexin clamping and activation function
Source: eLife. 2022 Apr 20;11:e71938. doi: 10.7554/eLife.71938 (PMC9020821; doi:10.7554/eLife.71938)
Supplement: Figure 2—figure supplement 1—source data 1. [file elife-71938-fig2-figsupp1-data1.xlsx]

## Sheet: Sheet1
	Figure 2 Supplement 1
		Survival Percentage
	Time (sec)	No CPX		mCPXWT		mCPX48-134		mCPX4A		mCPX26-134		mCPX26-83
		Average	SD	Average	SD	Average	SD	Average	SD	Average	SD	Average	SD
	0	100	0	100	0	100	0	100	0	100	0	100	0
	0.147	100	0	100	0	100	0	100	0	100	0	100	0
	0.294	100	0	100	0	100	0	100	0	100	0	100	0
	0.441	99.626	0.49	100	0	100	0	100	0	100	0	100	0
	0.588	99.149	0.883	100	0	100	0	99.6234	0.32619	100	0	98.8095	1.68359
	0.735	97.54	1.854	99.892	0.265	100	0	99.0584	0.81547	100	0	98.2143	2.52538
	0.882	96.753	1.427	99.892	0.265	99.5495	0.58515	98.1168	1.17608	100	0	97.6191	1.68359
	1.029	95.194	0.958	99.892	0.265	97.7477	1.17031	96.7985	1.14166	100	0	97.6191	1.68359
	1.176	92.981	1.787	99.892	0.265	95.9459	1.75546	95.6685	1.55581	100	0	96.4286	1.68359
	1.323	91.55	1.968	99.804	0.307	95.4955	1.54817	92.2787	3.09877	100	0	95.8333	0.84179
	1.47	89.749	1.829	99.804	0.307	95.4955	1.54817	90.2072	4.08711	100	0	95.2381	0
	1.617	87.869	1.458	99.804	0.307	94.5946	1.75546	88.8889	4.54033	100	0	94.0476	0
	1.764	84.817	1.98	99.804	0.307	93.2432	1.01351	84.3691	5.24187	100	0	94.0476	0
	1.911	82.82	2.296	99.627	0.649	91.4414	0.58515	82.1092	5.81902	100	0	92.8571	1.68359
	2.058	80.45	2.807	99.627	0.649	90.0901	0.58515	80.0377	5.96797	99.4152	1.0129	92.8571	1.68359
	2.205	77.306	2.249	99.539	0.851	82.8829	4.57019	76.6478	4.87101	99.4152	1.0129	92.2619	0.84179
	2.352	74.19	3.13	99.539	0.851	81.0811	4.6445	74.388	5.24187	98.2456	0	92.2619	0.84179
	2.499	71.728	2.469	99.363	1.27	79.2793	5.20095	71.1864	4.80226	97.6608	1.0129	91.6667	1.68359
	2.646	70.494	2.963	99.363	1.27	75.6757	3.51091	68.5499	5.08736	97.6608	1.0129	91.0714	2.52538
	2.793	68.288	2.389	99.363	1.27	73.4234	4.68121	66.4783	5.93445	97.6608	1.0129	89.8809	4.20897
	2.94	66.597	2.005	99.363	1.27	72.0721	4.09607	63.4652	5.76391	97.6608	1.0129	89.8809	4.20897
	3.087	63.6	2.25	99.363	1.27	72.0721	4.09607	61.9586	6.44374	97.6608	1.0129	89.8809	4.20897
	3.234	60.4	4.026	99.363	1.27	71.1712	4.09607	59.887	6.11763	97.6608	1.0129	89.2857	5.05076
	3.381	58.688	4.197	99.274	1.482	71.1712	4.09607	57.4388	5.94116	97.6608	1.0129	88.6905	4.20897
	3.528	56.317	4.285	99.274	1.482	70.7207	4.21959	55.7439	6.369	97.6608	1.0129	88.0952	3.36718
	3.675	54.772	4.441	99.274	1.482	66.2162	5.06757	54.049	6.22325	97.076	1.0129	88.0952	3.36718
	3.822	53.304	4.193	99.166	1.499	64.8649	5.06757	51.6007	7.06968	96.4912	1.75439	86.9048	1.68359
	3.969	52.814	3.817	99.166	1.499	63.5135	5.64301	49.3409	7.22597	95.9064	1.0129	85.7143	1.68359
	4.116	51.102	4.4	99.166	1.499	60.8108	6.64605	47.4576	6.92523	95.9064	1.0129	82.7381	2.52538
	4.263	48.464	4.681	99.166	1.499	59.9099	6.74831	46.7043	7.09222	95.9064	1.0129	81.5476	4.20897
	4.41	47.483	3.978	99.166	1.499	59.4595	6.64605	45.1977	6.49718	95.9064	1.0129	81.5476	4.20897
	4.557	46.05	3.471	99.166	1.499	58.5586	6.59433	44.0678	6.92523	95.9064	1.0129	80.9524	3.36718
	4.704	44.854	4.006	99.058	1.561	58.1081	6.08108	41.6196	6.49922	95.9064	1.0129	80.3571	2.52538
	4.851	43.163	4.444	99.058	1.561	57.6577	6.10917	38.983	5.67087	95.9064	1.0129	80.3571	2.52538
	4.998	40.757	4.757	99.058	1.561	56.7568	5.06757	37.8531	6.01237	95.3216	1.0129	80.3571	2.52538
	5.145	39.84	4.384	98.882	1.948	51.3513	4.6445	36.7232	5.38948	94.1521	1.0129	79.7619	1.68359
	5.292	39.169	5.071	98.617	2.555	48.6487	3.65428	35.4049	5.40674	93.5673	1.0129	79.1667	0.84179
	5.439	38.434	5.316	98.617	2.555	46.8469	2.34061	35.0282	5.55715	93.5673	1.0129	75.5952	2.52538
	5.586	37.25	4.965	98.529	2.761	45.946	2.68151	33.71	5.40674	92.3977	2.02579	72.0238	2.52538
	5.733	35.321	5.002	98.529	2.761	43.6937	2.55062	32.3917	5.98799	92.3977	2.02579	69.0476	3.36718
	5.88	33.869	5.31	98.529	2.761	42.7928	2.1098	31.4501	5.8053	92.3977	2.02579	66.6667	6.73435
	6.027	32.788	5.064	98.421	2.796	41.8919	1.75546	30.1318	5.25707	92.3977	2.02579	66.0714	5.89256
	6.174	31.834	5.104	98.421	2.796	40.0901	2.1098	29.7552	5.40674	92.3977	2.02579	66.0714	5.89256
	6.321	29.97	4.916	98.421	2.796	39.1892	3.04054	27.8719	4.81332	92.3977	2.02579	66.0714	5.89256
	6.468	28.363	5.543	98.421	2.796	38.7387	2.55062	27.1186	5.23171	92.3977	2.02579	66.0714	5.89256
	6.615	27.499	4.593	98.421	2.796	34.2342	2.1098	26.3653	4.66173	90.6433	3.65205	63.6905	4.20897
	6.762	27.06	4.927	98.421	2.796	31.982	1.54817	25.4237	4.23729	90.6433	3.65205	63.0952	5.05076
	6.909	26.711	4.529	98.421	2.796	31.0811	2.02703	25.2354	4.24043	90.6433	3.65205	61.3095	2.52538
	7.056	25.501	4.875	98.421	2.796	27.027	1.01351	24.6704	4.11629	90.6433	3.65205	59.5238	5.05076
	7.203	24.933	4.72	98.421	2.796	26.1261	1.54817	23.5405	3.91764	90.6433	3.65205	58.9286	4.20897
	7.35	24.817	4.627	98.421	2.796	26.1261	1.54817	23.5405	3.91764	90.6433	3.65205	58.3333	5.05076
	7.497	24.817	4.627	98.421	2.796	26.1261	1.54817	22.4106	3.64323	90.6433	3.65205	58.3333	5.05076
	7.644	23.927	5.137	98.421	2.796	25.2252	2.55062	22.2222	3.76177	90.6433	3.65205	58.3333	5.05076
	7.791	23.053	5.24	98.421	2.796	25.2252	2.55062	21.4689	3.33046	90.6433	3.65205	58.3333	5.05076
	7.938	22.679	4.773	98.421	2.796	25.2252	2.55062	20.9039	3.25779	90.6433	3.65205	58.3333	5.05076
	8.085	22.305	4.31	98.421	2.796	23.8739	2.34061	20.9039	3.25779	90.6433	3.65205	58.3333	5.05076
	8.232	22.305	4.31	98.421	2.796	22.973	2.68151	19.774	3.20843	89.4737	3.50877	57.1429	6.73435
	8.379	22.305	4.31	98.333	2.998	22.5225	2.55062	19.774	3.20843	89.4737	3.50877	56.5476	5.89256
	8.526	22.188	4.214	98.333	2.998	22.5225	2.55062	19.3974	3.14986	89.4737	3.50877	56.5476	5.89256
	8.673	21.853	4.343	98.333	2.998	22.5225	2.55062	19.0207	2.82957	89.4737	3.50877	55.9524	5.05076
	8.82	21.853	4.343	98.333	2.998	22.5225	2.55062	19.0207	2.82957	89.4737	3.50877	55.9524	5.05076
	8.967	20.643	4.63	98.333	2.998	22.5225	2.55062	18.8324	2.66995	89.4737	3.50877	55.9524	5.05076
	9.114	20.269	4.164	98.333	2.998	22.5225	2.55062	18.8324	2.66995	89.4737	3.50877	55.9524	5.05076
	9.261	20.05	4.373	98.333	2.998	22.0721	3.09634	18.4557	2.35216	89.4737	3.50877	55.3571	4.20897
	9.408	19.934	4.281	98.333	2.998	21.1712	3.25799	17.5141	1.76412	89.4737	3.50877	55.3571	4.20897
	9.555	19.934	4.281	98.333	2.998	19.8198	3.25799	17.3258	1.88088	89.4737	3.50877	55.3571	4.20897
	9.702	19.598	4.436	98.333	2.998	19.8198	3.25799	16.7608	1.60629	89.4737	3.50877	55.3571	4.20897
	9.849	19.146	4.558	98.244	3.201	18.9189	2.68151	16.7608	1.60629	88.8889	4.41511	55.3571	4.20897
	9.996	19.03	4.503	98.244	3.201	18.9189	2.68151	16.3842	1.85238	88.8889	4.41511	55.3571	4.20897
				Number of independent experiments = 3
				Number of vesicle measured: ~150
