# Supplementary material for: Molecular determinants of complexin clamping and activation function
Source: eLife. 2022 Apr 20;11:e71938. doi: 10.7554/eLife.71938 (PMC9020821; doi:10.7554/eLife.71938)
Supplement: Figure 2—figure supplement 2—source data 1. [file elife-71938-fig2-figsupp2-data1.xlsx]

## Sheet: Sheet1
	Figure 2 Supplement 2
		Survival Percentage
		mCPXWT		mCPXL117W
	Concentration	Average	SD	Average	SD
	0.125	5.2	1.3	15	2
	0.25	6.5	2.5	28.3333	1.52753
	0.5	15.76	3.25	55.6667	3.21455
	1	50.34	5.3	81	3.60555
	2	90.6	4.3	89.3333	2.08167
		Number of independent experiments = 3
		Number of vesicle measured: ~100
