# Supplementary material for: Molecular determinants of complexin clamping and activation function
Source: eLife. 2022 Apr 20;11:e71938. doi: 10.7554/eLife.71938 (PMC9020821; doi:10.7554/eLife.71938)
Supplement: Figure 3—figure supplement 1—source data 1. [file elife-71938-fig3-figsupp1-data1.xlsx]

## Sheet: Sheet1
Figure 3 Supplement 1
	Survival Percentage
Time (sec)	CPXSC		CPXGP		CPXNC1		CPXNC2
	Average	SD	Average	SD	Average	SD	Average	SD
0	100	0	100	0	100	0	100	0
0.147	100	0.29095	100	0	100	0	100	0
0.294	100	0.29095	100	0	100	0	100	0
0.441	100	0.29095	100	0	100	0	99.3197	0
0.588	100	0.29095	99.8062	0.33567	99.5238	0.82479	98.6395	0.82479
0.735	99.9002	0.33252	98.8591	0.96908	99.0476	1.64957	97.9592	1.64957
0.882	99.9002	0.33252	95.985	2.97474	98.0952	2.18218	96.5986	2.18218
1.029	99.9002	0.33252	92.8897	1.90888	98.0952	2.18218	95.2381	2.18218
1.176	99.9002	0.33252	90.4086	0.50066	97.6191	2.18218	92.517	2.18218
1.323	99.812	0.67507	88.8801	1.62425	97.6191	2.18218	88.4354	2.18218
1.47	99.812	0.67507	86.41	3.39841	97.1429	2.85714	85.7143	2.85714
1.617	99.812	0.87741	84.1063	4.08671	96.6667	2.18218	80.2721	2.18218
1.764	99.812	0.87741	82.395	5.77933	93.8095	0.82479	75.5102	0.82479
1.911	99.6357	1.29601	80.468	4.215	92.3809	0.82479	70.068	0.82479
2.058	99.6357	1.29601	77.5938	4.89191	90.4762	0.82479	68.0272	0.82479
2.205	99.5475	1.29601	76.4639	6.75653	79.0476	4.12393	65.3061	4.12393
2.352	99.5475	1.29601	73.5733	5.76238	76.1905	5.40848	61.2245	5.40848
2.499	99.371	1.29601	71.6737	7.7282	72.3809	5.01698	58.5034	5.01698
2.646	99.371	1.29601	69.5693	7.94382	70	5.15079	54.4218	5.15079
2.793	99.371	1.50807	67.2656	7.99117	68.5714	5.15079	51.7007	5.15079
2.94	99.371	1.50807	66.324	9.59948	68.5714	5.15079	49.6599	5.15079
3.087	99.371	1.50807	64.0038	8.15746	68.0952	4.36436	46.9388	4.36436
3.234	99.371	1.52502	63.8155	8.47639	67.6191	3.59516	44.898	3.59516
3.381	99.2829	1.52502	62.6527	8.07983	67.6191	3.59516	42.1769	3.59516
3.528	99.2829	1.52502	59.7622	7.15982	66.6667	2.97381	40.8163	2.97381
3.675	99.2829	1.52502	59.1972	8.02855	61.9048	4.59221	39.4558	4.59221
3.822	99.1745	1.52502	56.2902	6.42118	61.9048	4.59221	39.4558	4.59221
3.969	99.1745	1.52502	53.8037	6.21732	61.4286	5.15079	36.7347	5.15079
4.116	99.1745	1.58742	51.3336	8.76264	60.9524	5.7735	34.6939	5.7735
4.263	99.1745	1.58742	46.931	9.21925	60.4762	5.01698	33.3333	5.01698
4.41	99.1745	1.58742	45.9839	10.2446	60.4762	5.01698	33.3333	5.01698
4.557	99.1745	1.97368	44.6273	9.03444	60	4.28571	31.9728	4.28571
4.704	99.0664	2.58065	43.2871	9.15117	59.5238	5.01698	31.2925	5.01698
4.851	99.0664	2.58065	42.5119	8.68007	59.0476	4.36436	29.2517	4.36436
4.998	99.0664	2.78711	40.7842	9.21982	56.6667	2.18218	27.8912	2.18218
5.145	98.89	2.78711	39.8207	8.6754	50	1.42857	27.2109	1.42857
5.292	98.6255	2.78711	38.0929	9.43406	44.2857	2.85714	27.2109	2.85714
5.439	98.6255	2.82202	36.7418	8.55069	41.9048	1.64957	26.5306	1.64957
5.586	98.5374	2.82202	33.491	9.14571	40.4762	2.18218	25.8503	2.18218
5.733	98.5374	2.82202	32.1618	10.3548	40.4762	2.18218	25.1701	2.18218
5.88	98.5374	2.82202	29.1048	11.2592	40.4762	2.18218	25.1701	2.18218
6.027	98.4292	2.82202	28.5234	10.708	39.5238	2.18218	25.1701	2.18218
6.174	98.4292	2.82202	27.1832	10.9173	38.5714	2.85714	25.1701	2.85714
6.321	98.4292	2.82202	26.408	10.3508	37.6191	2.97381	23.8095	2.97381
6.468	98.4292	2.82202	25.0624	10.2298	36.6667	3.29914	23.8095	3.29914
6.615	98.4292	2.82202	24.492	10.7691	30.4762	2.97381	22.449	2.97381
6.762	98.4292	2.82202	23.5284	10.5954	28.5714	2.47436	21.7687	2.47436
6.909	98.4292	2.82202	22.9525	10.5864	26.6667	0.82479	21.7687	0.82479
7.056	98.4292	2.82202	20.8536	11.5806	24.2857	1.42857	21.7687	1.42857
7.203	98.4292	2.82202	19.7072	11.8607	23.8095	1.64957	21.7687	1.64957
7.35	98.4292	2.82202	18.943	12.1729	23.8095	1.64957	21.0884	1.64957
7.497	98.4292	2.82202	17.7857	11.6202	23.3333	2.18218	21.0884	2.18218
7.644	98.4292	2.82202	17.5919	11.4137	22.3809	2.97381	21.0884	2.97381
7.791	98.4292	3.0236	17.0105	10.8796	21.9048	3.29914	20.4082	3.29914
7.938	98.4292	3.0236	17.0105	10.8796	21.9048	3.29914	19.7279	3.29914
8.085	98.4292	3.0236	16.6229	10.6257	21.9048	3.29914	19.7279	3.29914
8.232	98.4292	3.0236	15.8477	10.0821	21.4286	3.77964	19.7279	3.77964
8.379	98.341	3.0236	15.4601	9.63379	20.9524	4.36436	19.7279	4.36436
8.526	98.341	3.0236	15.0725	9.43017	20.4762	5.01698	19.7279	5.01698
8.673	98.341	3.0236	14.8787	9.19897	20.4762	5.01698	19.0476	5.01698
8.82	98.341	3.0236	14.6904	9.51735	20.4762	5.01698	19.0476	5.01698
8.967	98.341	3.0236	14.109	8.96507	20.4762	5.01698	18.3673	5.01698
9.114	98.341	3.0236	13.3392	8.66047	20.4762	5.01698	18.3673	5.01698
9.261	98.341	3.22744	12.9517	8.40737	20.4762	5.01698	18.3673	5.01698
9.408	98.341	3.22744	12.564	7.99283	20.4762	5.01698	18.3673	5.01698
9.555	98.341	3.22744	11.9827	7.64328	18.0952	4.59221	18.3673	4.59221
9.702	98.341	3.22744	11.9827	7.64328	18.0952	4.59221	18.3673	4.59221
9.849	98.2527	3.22744	11.9827	7.64328	17.6191	4.36436	18.3673	4.36436
9.996	98.2527	3.22744	11.7889	7.41757	17.6191	4.36436	18.3673	4.36436
		Number of independent experiments = 3
		Number of vesicle measured: ~150
