# Supplementary material for: Molecular determinants of complexin clamping and activation function
Source: eLife. 2022 Apr 20;11:e71938. doi: 10.7554/eLife.71938 (PMC9020821; doi:10.7554/eLife.71938)
Supplement: Figure 3—figure supplement 2—source data 1. [file elife-71938-fig3-figsupp2-data1.xlsx]

## Sheet: Sheet1
	Figure 3 Supplement 2
	Number of docked vesicles per 5mm hole
	mCPXWT	mCPXSC	mCPXGP	mCPXNC1	mCPXNC2	mCPXCE	mCPXEAAK	mCPXDM	No CPX
	7.96	7.6	7.5	2.1875	7.33333	5.3125	5.20408	5	1.9
	5.12	9.2	6	2.3	6.625	5.70313	5.5625	5.04688	1.76
	7.32	8.75	5.5	2.1875	7.11111	5.5	6.07813	5.875	3.2
	7.35	8.4	5.625	2.8	6.64063	6.32813	6.28125	6.59375	2.7
	7.08	8.9	6	3.23	7.67347	6.40625	6.4375	6.92188	2.1
	8.25	9.5	6.16	3.5	6.0625	5.04688	6.32813	6.64063	2.62
