# Supplementary material for: Molecular determinants of complexin clamping and activation function
Source: eLife. 2022 Apr 20;11:e71938. doi: 10.7554/eLife.71938 (PMC9020821; doi:10.7554/eLife.71938)
Supplement: Figure 3—figure supplement 4—source data 1. [file elife-71938-fig3-figsupp4-data1.xlsx]

## Sheet: Sheet1
Figure 3 Supplement 4
	Fusion Probablity
	Average	SD
mCPXWT	92	3
dmCPX	60	4
ceCPX	89	5
mCPXEAAK	86	2
Number of independent experiments = 3
Number of vesicle measured: ~100
