# Supplementary material for: Molecular determinants of complexin clamping and activation function
Source: eLife. 2022 Apr 20;11:e71938. doi: 10.7554/eLife.71938 (PMC9020821; doi:10.7554/eLife.71938)
Supplement: Figure 3—source data 1. [file elife-71938-fig3-data1.xlsx]

## Sheet: Sheet1
Figure 3A							Figure 3C
								Drosophila CPX					C. elegans CPX					mCPXEAAK
	2mM		20mM				Time (s)	2mM		20mM			2mM		20mM			2mM		20mM
	Average	SD	Average	SD				Average	SD	Average	SD		Average	SD	Average	SD		Average	SD	Average	SD
mCPXWT	90.6	4.2	93.6	2.4			0	100	0	100	0		100	0	100	0		100	0	100	0
mCPXSC	97.8	2.6	97.5	1.6			0.147	100	0	100	0		100	0	100	0		100	0	100	0
mCPXNC1	15.1	3.2	17.6	4.4			0.294	100	0	100	0		99.0267	0.84296	100	0		100	0.775523	100	1.09585
mCPXNC2	16.1	2.2	17.7	4.6			0.441	100	0	100	0		97.0872	0.02461	100	0		100	0.0226412	100	0.031993
mCPXGP	11.78	4.41	17.8	2.6			0.588	99.2064	0.68732	100	0		97.0872	0.02461	100	0		96.9697	0.0226412	100	0.031993
							0.735	97.5355	1.19924	100	0		97.0872	0.02461	100	0		96.9697	0.0226412	96.1539	0.031993
Number of independent experiments = 3-4							0.882	95.4678	0.86895	100	0		95.1478	0.81891	100	0		93.9394	0.753397	90.3846	1.06458
Number of vesicle measured: ~250							1.029	95.071	0.2894	100	0		93.6985	1.63656	100	0		93.9394	1.50564	88.4615	2.12753
							1.176	94.6742	0.59771	100	0		93.6985	1.63656	100	0		87.8788	1.50564	88.4615	2.12753
							1.323	94.6742	0.59771	100	0		93.6985	1.63656	100	0		81.8182	1.50564	88.4615	2.12753
							1.47	92.1261	2.37297	100	0		93.2154	2.17896	100	0		78.7879	2.00464	86.5385	2.83265
							1.617	91.3325	1.7163	100	0		92.2421	2.17684	99.3939	1.04973		69.697	2.00269	84.6154	2.82989
Figure 3B							1.764	90.9357	1.26612	100	0		89.8053	2.89983	97.5758	2.77732		66.6667	2.66784	84.6154	3.76978
Concentration (mM)	mCPXWT		mCPXSC				1.911	85.9231	5.1874	100	0		85.9264	2.98809	96.3636	3.14918		60.6061	2.74904	80.7692	3.88452
	Average	SD	Average	SD			2.058	83.8555	5.95216	100	0		82.0404	3.63329	95.1515	4.57566		60.6061	3.34263	80.7692	4.72328
0.125	5.2	1.3	5.20985	1.15152			2.205	80.2005	4.12155	100	0		75.7175	3.46302	92.7273	4.81046		51.5151	3.18598	76.9231	4.50193
0.25	6.5	2.5	8.11685	2.94068			2.352	78.1328	4.24635	98.5507	1.44928		69.4018	5.16776	91.5152	5.84464		45.4545	4.75434	75	6.71809
0.5	15.76	3.25	50.2095	8.54936			2.499	74.7911	5.79848	96.6184	3.01691		66.9864	3.69045	90.9091	6.29837		45.4545	3.39521	73.0769	4.79758
1	50.34	5.3	92.3064	3.13949			2.646	71.8463	7.89208	95.6522	3.83442		63.5976	1.20262	89.697	4.19891		43.9394	1.10641	67.3077	1.56341
2	90.6	4.2	97.7833	2.62517			2.793	71.0526	6.93991	92.7536	3.83442		62.1412	1.19282	89.0909	4.81046		40.9091	1.09739	65.3846	1.55067
20	93.56	2.35	97.56	1.574			2.94	68.985	7.34955	89.8551	5.22544		60.1947	0.72974	89.0909	4.81046		37.8788	0.671361	61.5385	0.948662
							3.087	67.7109	8.58404	87.4396	6.03381		58.7383	0.72839	88.4848	5.24864		34.8485	0.670119	61.5385	0.946907
Number of independent experiments = 3							3.234	66.0401	9.40872	84.5411	5.85718		53.8718	2.53474	87.8788	5.84464		33.3333	2.33196	61.5385	3.29516
Number of vesicle measured: ~150							3.381	64.8496	8.81946	81.6425	6.53514		53.3888	2.73595	86.6667	7.34809		33.3333	2.51707	61.5385	3.55673
							3.528	61.5915	9.42915	80.6763	7.29453		48.5365	3.16848	86.0606	7.56969		33.3333	2.915	61.5385	4.11902
							3.675	59.9206	10.1249	78.744	4.42761		45.6309	2.17423	83.0303	6.88353		33.3333	2.00029	61.5385	2.8265
							3.822	57.9365	8.36163	78.2609	3.83442		43.6843	2.35219	83.0303	6.88353		33.3333	2.16401	61.5385	3.05785
							3.969	54.6784	6.76353	77.7778	3.64726		41.2617	2.17517	82.4242	7.34809		30.303	2.00116	59.6154	2.82772
							4.116	53.8847	6.12499	77.2947	3.01691		41.2617	2.17517	80.6061	7.56969		27.2727	2.00116	59.6154	2.82772
							4.263	53.0911	5.49822	77.2947	3.01691		40.2955	1.0522	80.6061	7.56969		25.7576	0.968024	59.6154	1.36786
							4.41	51.0234	6.2047	77.2947	3.01691		40.2955	1.0522	78.7879	4.57566		21.2121	0.968024	55.7692	1.36786
							4.557	49.8329	5.01462	75.8454	2.2138		39.8053	0.72974	77.5758	5.24864		18.1818	0.671361	55.7692	0.948662
							4.704	49.4361	4.44421	75.8454	2.2138		37.8588	2.37142	76.3636	4.81046		18.1818	2.18171	55.7692	3.08285
							4.851	48.1621	5.76044	74.8792	3.64726		37.3757	2.94645	75.7576	5.55464		16.6667	2.71073	55.7692	3.83039
							4.998	47.3684	4.71093	74.3961	3.64726		34.4629	2.95097	75.7576	5.55464		15.1515	2.71489	53.8462	3.83626
							5.145	44.9039	5.27111	73.913	3.83442		32.5234	3.6262	74.5455	4.81046		15.1515	3.3361	53.8462	4.71406
							5.292	44.5071	5.27818	72.4638	2.89855		32.0403	2.91116	73.9394	5.24864		15.1515	2.67827	53.8462	3.78451
							5.439	44.1103	4.66824	72.4638	2.89855		32.0403	2.91116	73.9394	5.24864		15.1515	2.67827	53.8462	3.78451
							5.586	44.1103	4.66824	71.9807	3.64726		29.6107	2.18073	73.9394	5.24864		15.1515	2.00627	53.8462	2.83495
							5.733	42.9198	3.0432	71.4976	3.01691		29.1276	1.47002	73.9394	5.24864		15.1515	1.35242	53.8462	1.91103
							5.88	42.523	2.64076	71.4976	3.01691		28.1543	0.74778	73.9394	5.24864		15.1515	0.687958	53.8462	0.972114
							6.027	42.1262	2.37297	71.0145	2.51022		26.6979	0.75091	73.3333	5.84464		13.6364	0.690837	53.8462	0.976183
							6.174	41.7293	2.28761	71.0145	2.51022		26.2148	1.4661	72.1212	5.55464		12.1212	1.34881	53.8462	1.90593
							6.321	40.4553	3.6028	71.0145	2.51022		25.7246	1.57931	71.5152	4.57566		10.6061	1.45297	51.9231	2.0531
							6.468	40.4553	3.6028	71.0145	2.51022		24.7513	2.4178	70.303	6.38524		9.09091	2.22438	51.9231	3.14314
							6.615	40.4553	3.6028	70.5314	2.2138		24.2683	1.58424	69.0909	7.27273		9.09091	1.4575	51.9231	2.05951
							6.762	40.0585	3.0292	70.5314	2.2138		23.7852	0.75773	68.4848	7.34809		9.09091	0.697112	51.9231	0.985049
							6.909	39.6617	2.5133	70.5314	2.2138		23.7852	0.75773	68.4848	7.34809		9.09091	0.697112	51.9231	0.985049
							7.056	39.2648	2.09814	70.5314	2.2138		23.3021	0.19688	67.2727	7.92527		9.09091	0.18113	50	0.255944
							7.203	38.868	1.8527	70.5314	2.2138		23.3021	0.19688	66.6667	8.39782		9.09091	0.18113	50	0.255944
							7.35	38.868	1.8527	70.5314	2.2138		23.3021	0.19688	66.6667	8.39782		9.09091	0.18113	50	0.255944
							7.497	37.594	3.16276	70.5314	2.2138		23.3021	0.19688	66.6667	8.39782		9.09091	0.18113	48.0769	0.255944
							7.644	37.594	3.16276	70.0483	1.67348		22.8119	0.65216	66.6667	8.39782		9.09091	0.599987	48.0769	0.847808
							7.791	37.594	3.16276	69.5652	1.44928		21.3626	0.94268	66.6667	8.39782		9.09091	0.867266	48.0769	1.22548
							7.938	37.1972	2.65411	69.5652	1.44928		21.3626	0.94268	66.0606	7.34809		9.09091	0.867266	48.0769	1.22548
							8.085	37.1972	2.65411	69.5652	1.44928		20.3893	1.45948	65.4545	6.29837		9.09091	1.34272	48.0769	1.89732
							8.232	36.8003	2.53921	69.5652	1.44928		20.3893	1.45948	64.8485	6.88353		9.09091	1.34272	48.0769	1.89732
							8.379	35.1295	3.29727	69.5652	1.44928		20.3893	1.45948	63.6364	4.81046		9.09091	1.34272	46.1538	1.89732
							8.526	35.1295	3.29727	69.5652	1.44928		18.9329	0.15996	63.0303	3.78485		9.09091	0.147163	46.1538	0.207948
							8.673	35.1295	3.29727	69.5652	1.44928		18.9329	0.15996	63.0303	3.78485		7.57576	0.147163	46.1538	0.207948
							8.82	35.1295	3.29727	69.5652	1.44928		18.9329	0.15996	63.0303	3.78485		7.57576	0.147163	46.1538	0.207948
							8.967	35.1295	3.29727	69.0821	0.83674		18.9329	0.15996	63.0303	3.78485		7.57576	0.147163	46.1538	0.207948
							9.114	34.7327	2.79531	69.0821	0.83674		18.9329	0.15996	62.4242	4.19891		6.06061	0.147163	46.1538	0.207948
							9.261	33.939	2.12879	69.0821	0.83674		18.9329	0.15996	61.8182	4.81046		6.06061	0.147163	46.1538	0.207948
							9.408	33.939	2.12879	69.0821	0.83674		18.9329	0.15996	61.8182	4.81046		6.06061	0.147163	46.1538	0.207948
							9.555	33.5422	2.07557	69.0821	0.83674		17.4766	0.14766	61.8182	4.81046		6.06061	0.135847	46.1538	0.191958
							9.702	33.5422	2.07557	69.0821	0.83674		17.4766	0.14766	61.8182	4.81046		6.06061	0.135847	46.1538	0.191958
							9.849	33.5422	2.07557	68.599	0.83674		17.4766	0.14766	61.8182	4.81046		6.06061	0.135847	46.1538	0.191958
							9.996	33.5422	2.07557	68.599	0.83674		17.4766	0.14766	61.8182	4.81046		6.06	0.135847	46.1538	0.191958
									Number of independent experiments = 3
									Number of vesicle measured: ~125
