# Supplementary material for: Molecular determinants of complexin clamping and activation function
Source: eLife. 2022 Apr 20;11:e71938. doi: 10.7554/eLife.71938 (PMC9020821; doi:10.7554/eLife.71938)
Supplement: Figure 4—source data 1. [file elife-71938-fig4-data1.xlsx]

## Sheet: Sheet1
Figure 4A				Figure 4C
	Normalized Fluorescence Instensity				Frequency (%)
Time (msec)	Calcium greeen	Sulphorhodamine-B		Time (msec)	Syt1-VAMP70+CPX	Syt1-VAMP12
13	0.47967	0.41867		7	58	55
26	0.42244	0.43411		14	22	23
39	0.47734	0.48453		21	10	13
52	0.48882	0.44615		28	8	5
65	0.49495	0.44744		35	2	2
78	0.50781	0.43084		70	1	1
91	0.50999	0.43382		105	1	1
104	0.51053	0.51429
117	0.75577	0.92203		Figure 4D
130	1	1
143	0.98562	0.6179		Fusion Probability (100 mM Ca2+)
156	0.97821	0.46879		No CPX	mCPXWT	mCPX26-134	mCPX26-83	mCPX48-134	mCPX4A	mCPXGP	mCPXEAAK	ceCPX
169	0.90773	0.19591		76.1905	87.5	88.0597	86.5385	68.5185	55.283	95.5556	90.991	92.562
182	0.84666	0.19563		74.6154	100	89.6552	89.7436	65.7143	49.2857	92.3077	88.6598	91.2088
195	0.80265	0.1814		78.1818	93.75	84.7826	87.0588	66.6667	53.2432	94.2857	89.4118	89.6552
208	0.76957	0.1516		71.1111	92.1875	87.6033	85.1064	71.0526	47.7612	89.4737	90.9091	87.5
221	0.72088	0.12453		74.5455	93.3884	85.5172	82.5397	67.1875	54.4444	91.75	90.7895	89.47
				72.2222	95.6897	82.8358	82.7586	52.9412	49.0196	96.42	92.3077	90.54
Figure 4B						Number of vesicle measured: ~150
	Fusion Probability (100 mM Ca2+)
	Average	SD
Syt1-VAMP70+CPX	93.8	3.68
Syt1-VAMP12	74.1	6.32
Syt1-VAMP12+CPX	93.4	3.94
Number of independent experiments = 3
Number of vesicle measured: ~125
